# Supplementary material for: The Inhibition of FGFR/PI3K/Akt Axis by AZD4547 Disrupts the Proangiogenic Microenvironment and Vasculogenic Mimicry Arising from the Interplay between Endothelial and Triple-Negative Breast Cancer Cells
Source: Preprints.org preprint supplement (doi:10.20944/preprints202307.1203.v1), 2023-07-18
Supplement: Supplementary file 1 [file supplementary]

## VE-Cadherin

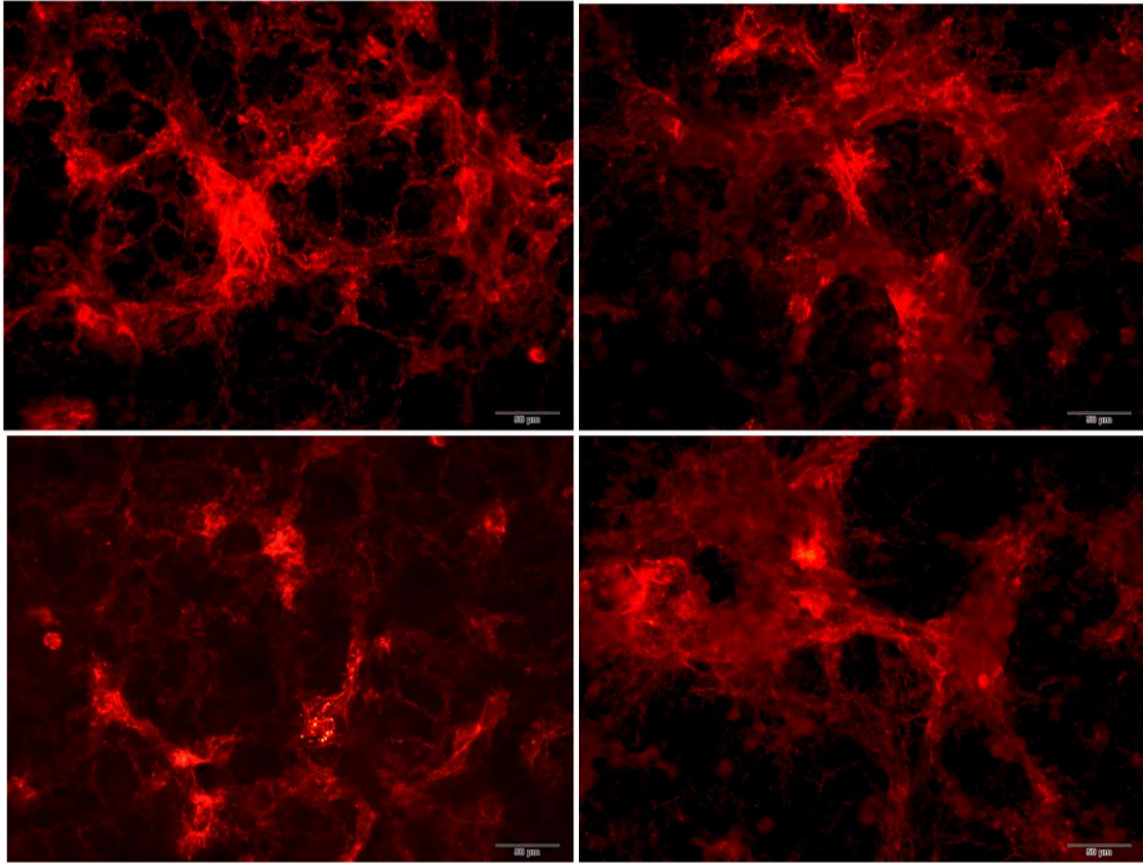

**Figure S2. Immunolocalization of VE-Cadherin in co-cultures of TNBC cells and endothelial cells.** HCC1806 and EA.hy926 cells were co-cultured for 48 h. Then, cells were fixed and processed for immunocytochemistry. The primary antibody anti-VE-Cadherin was made in mice. Incubations were undertaken overnight at 4°C. The secondary antibody was goat anti-mouse-Cyanine3 (red channel) Cells were photographed with a conventional fluorescence microscope. Representative 20x images are shown.
