# Supplementary material for: The Inhibition of FGFR/PI3K/Akt Axis by AZD4547 Disrupts the Proangiogenic Microenvironment and Vasculogenic Mimicry Arising from the Interplay between Endothelial and Triple-Negative Breast Cancer Cells
Source: Preprints.org preprint supplement (doi:10.20944/preprints202307.1203.v1), 2023-07-18
Supplement: Supplementary file 4 [file supplementary]

Archive with 3 entries (3 files):
- Figure S2.pdf
- Supplementary Table 1.pdf
- Figure S1.pdf
